# Supplementary material for: Pyruvate kinase L/R links metabolism dysfunction to neuroendocrine differentiation of prostate cancer by ZBTB10 deficiency
Source: PubMed Central journal article supplement (PMC8934352; doi:10.1038/s41419-022-04694-z), 2022-03-19

Figure 1H

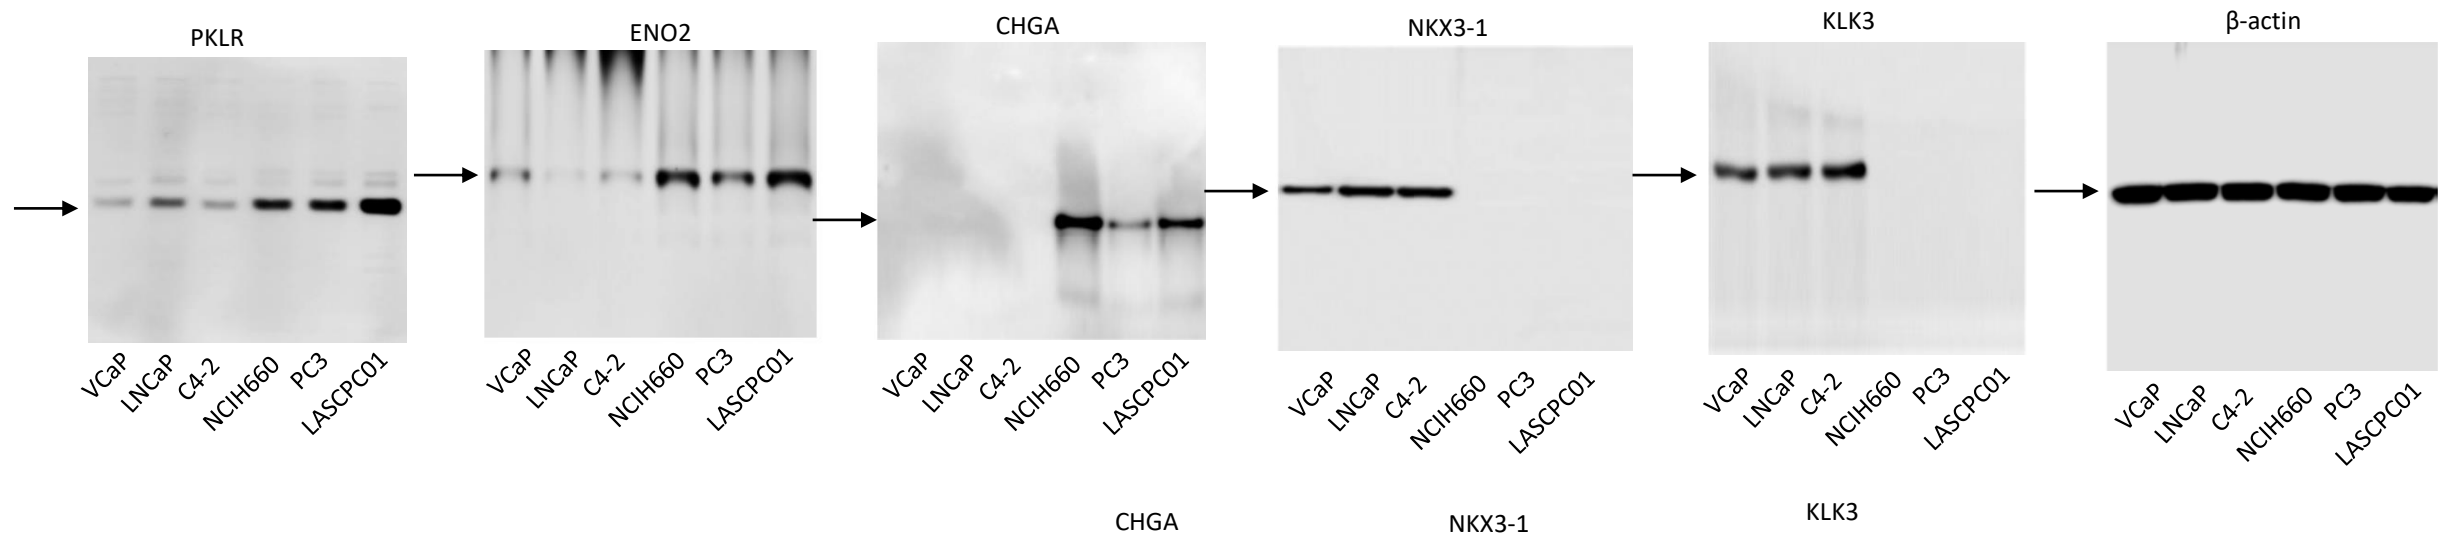

Figure 1K

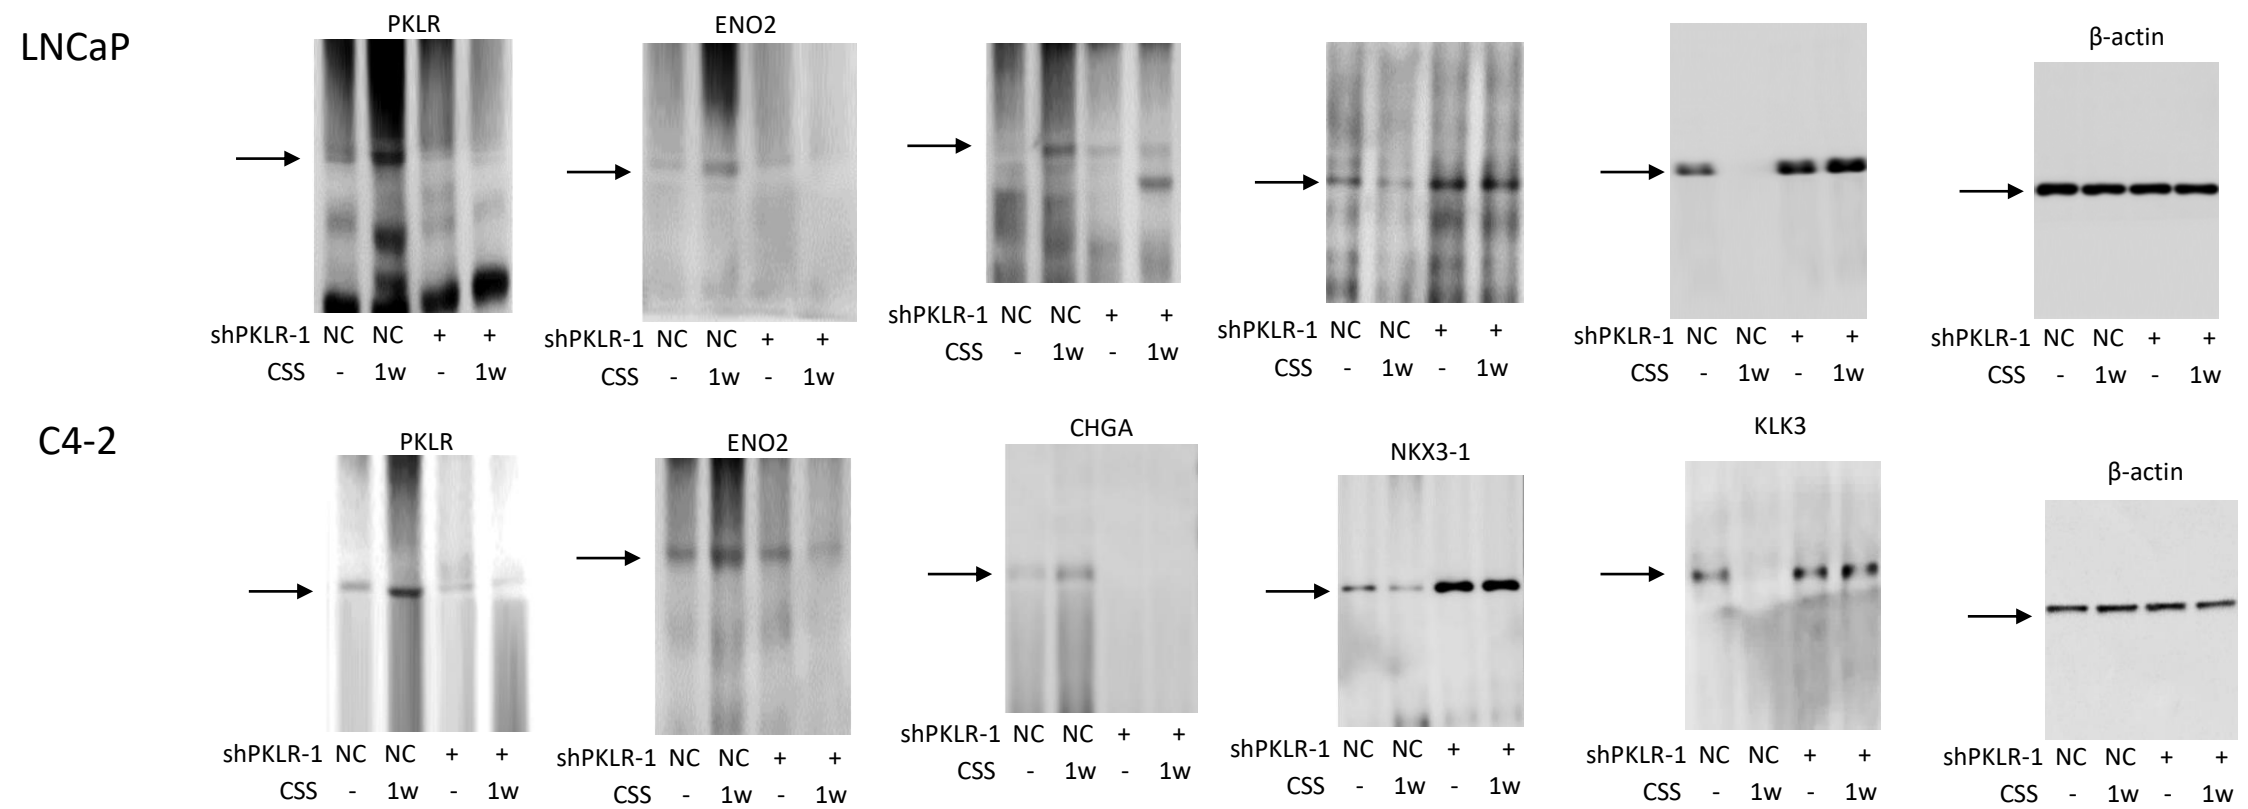

Figure 2C

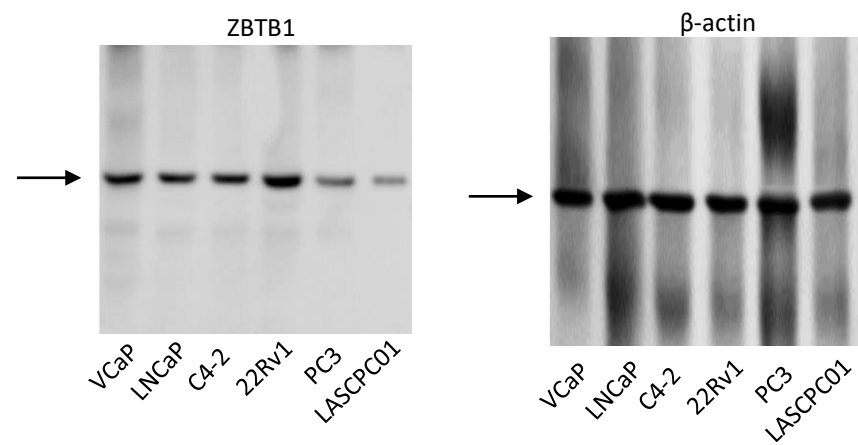

Figure 2F

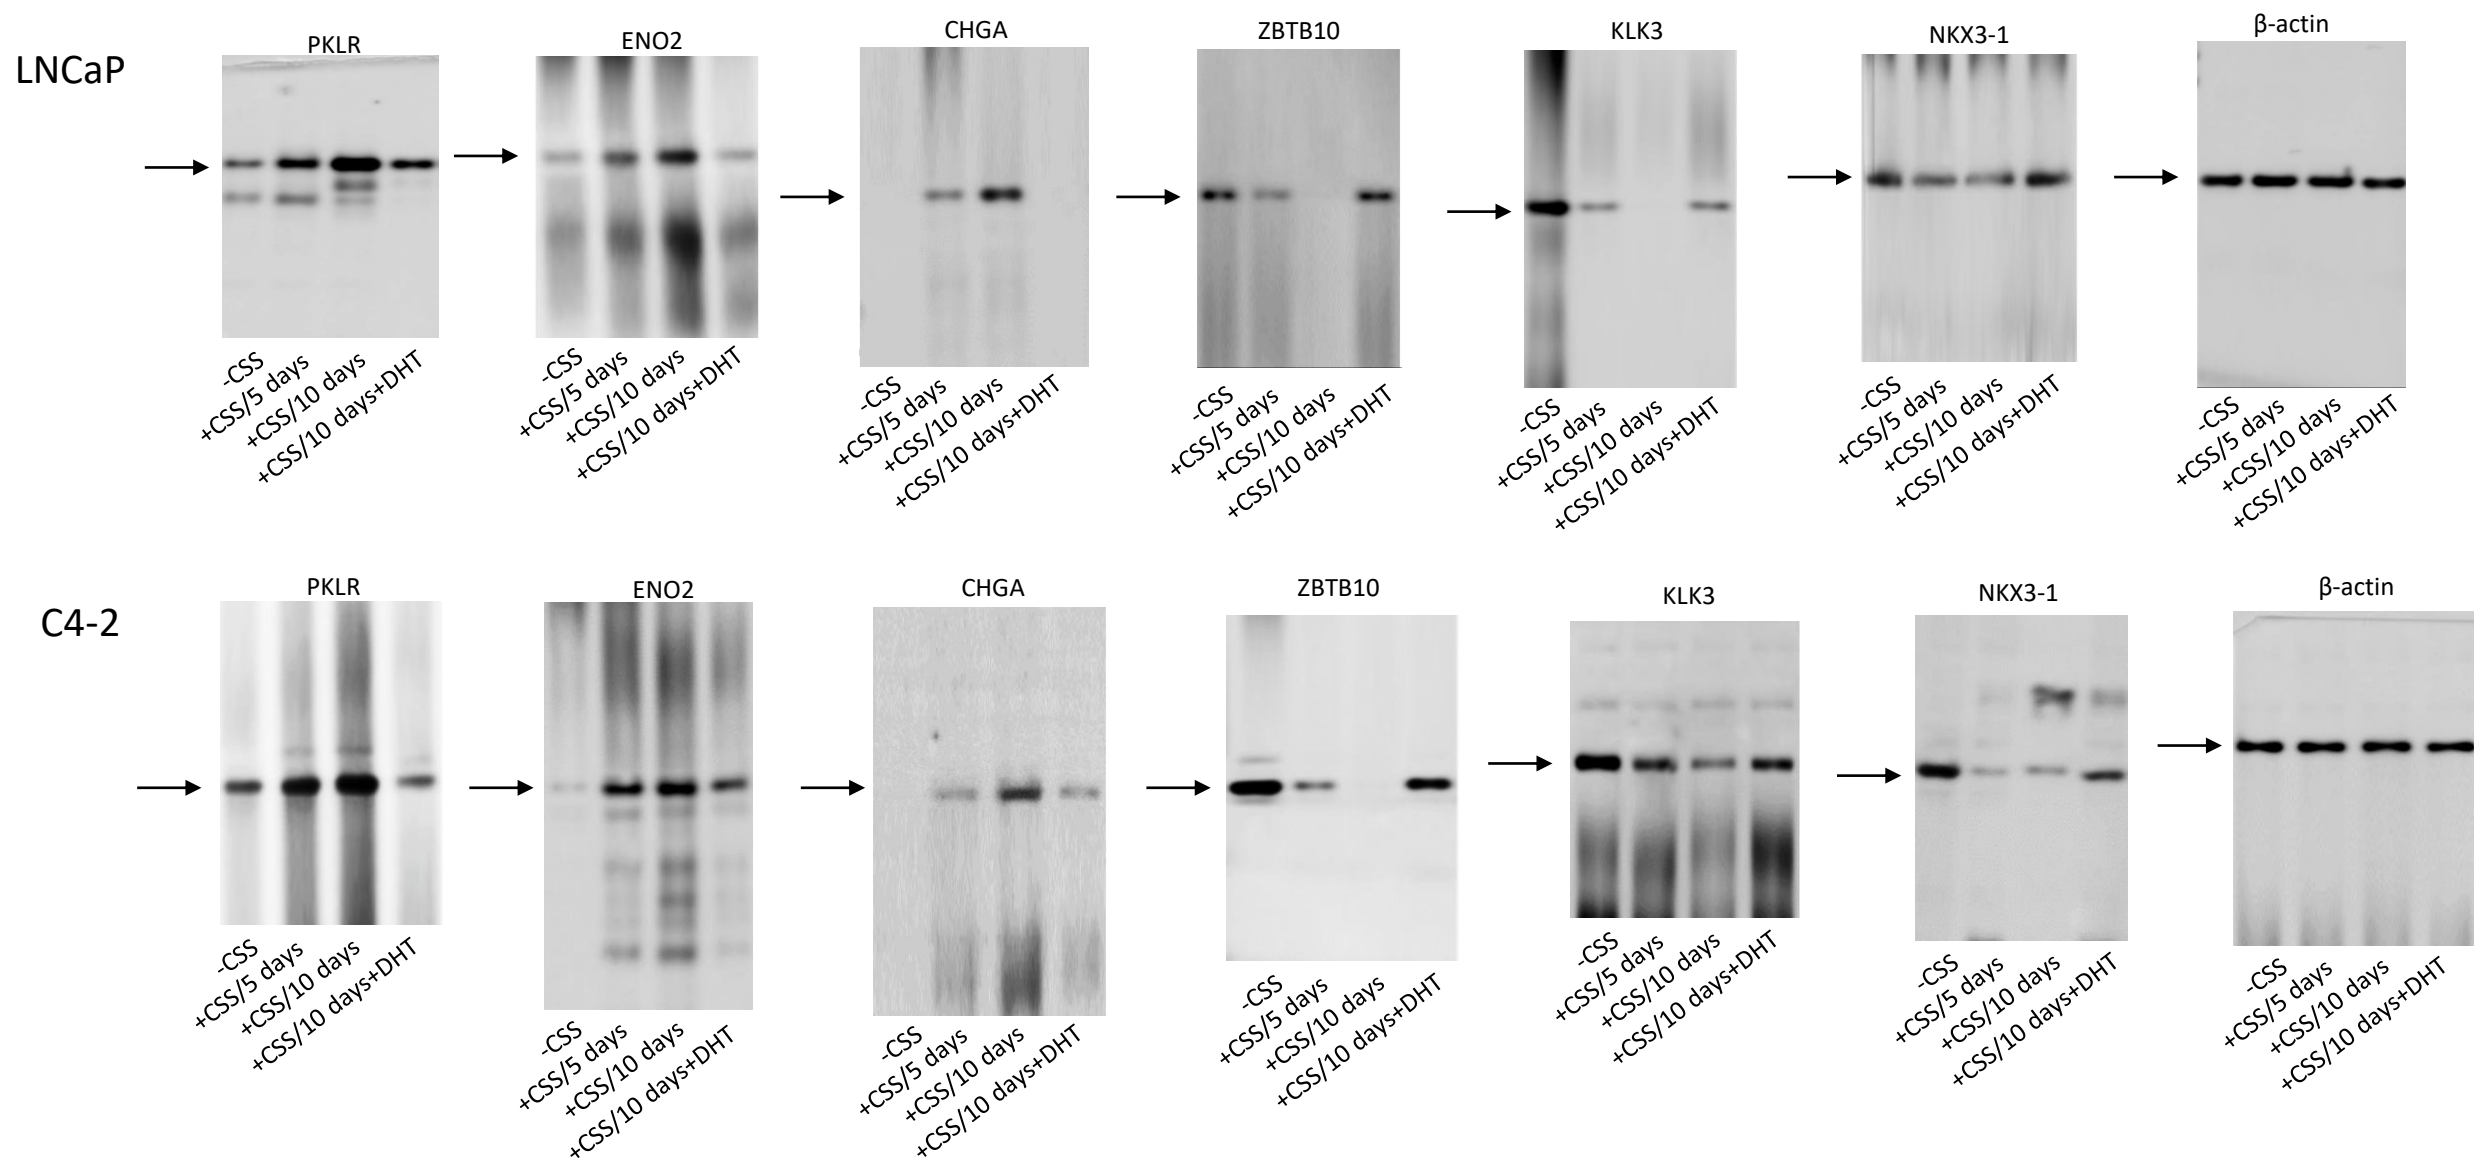

Figure 3A

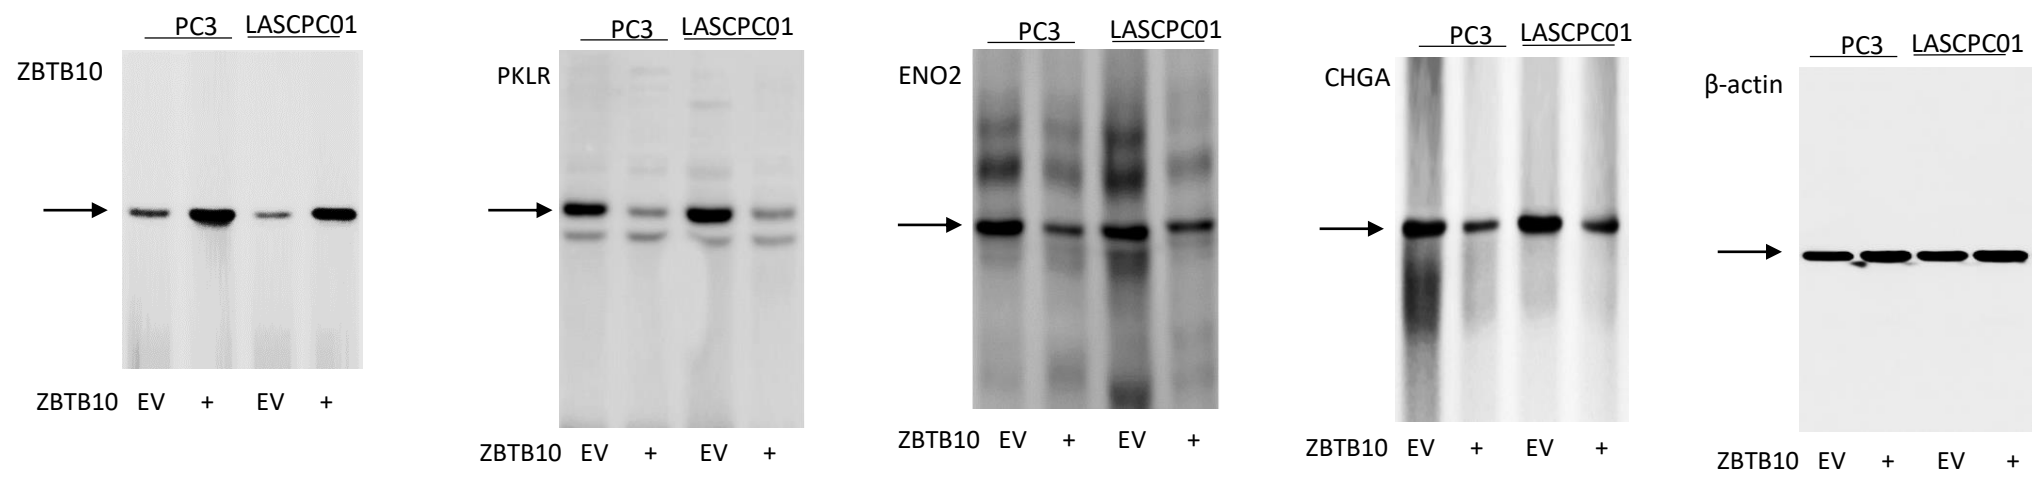

Figure 4K

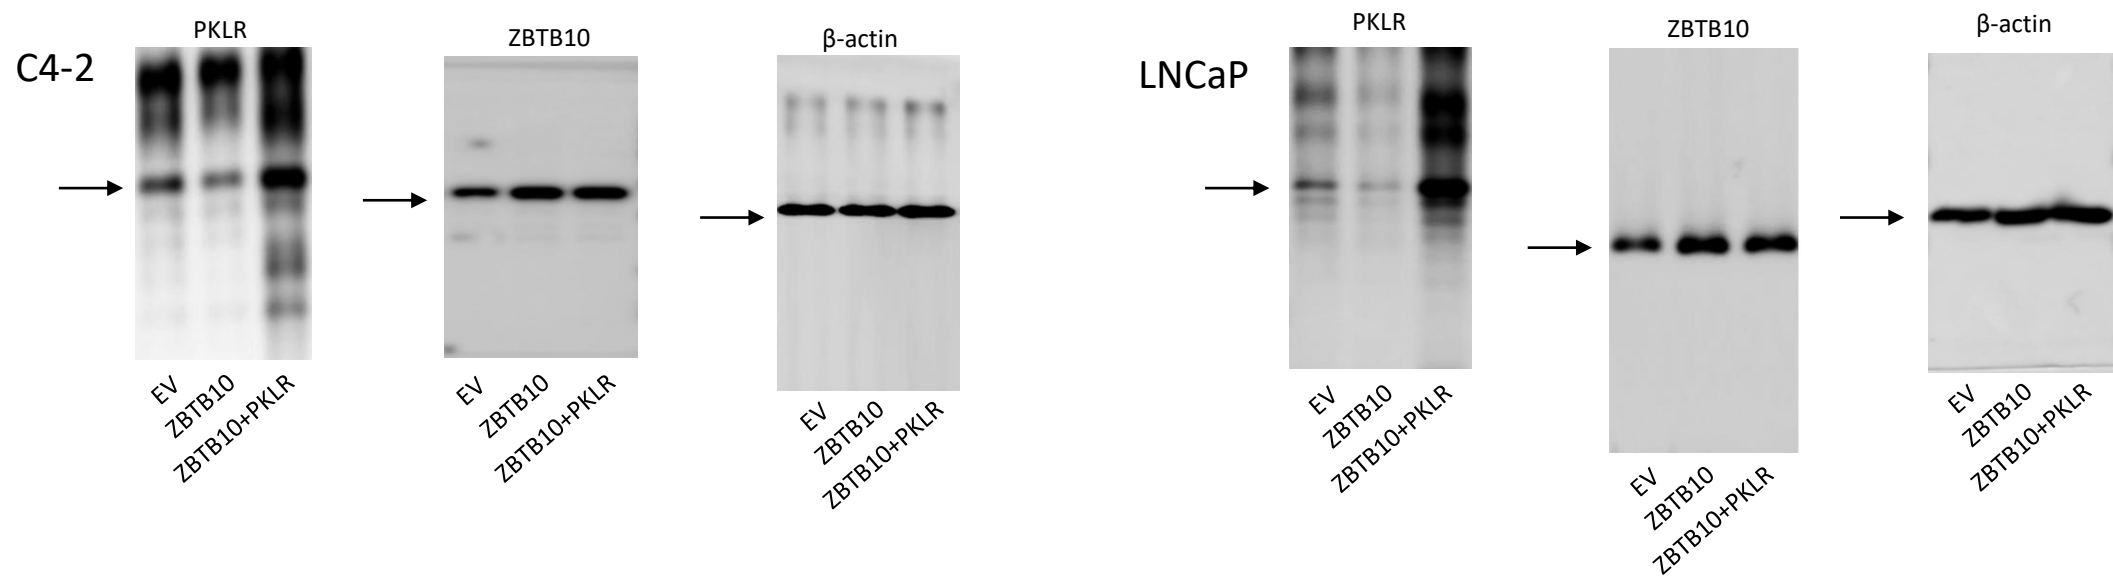

Figure 5E

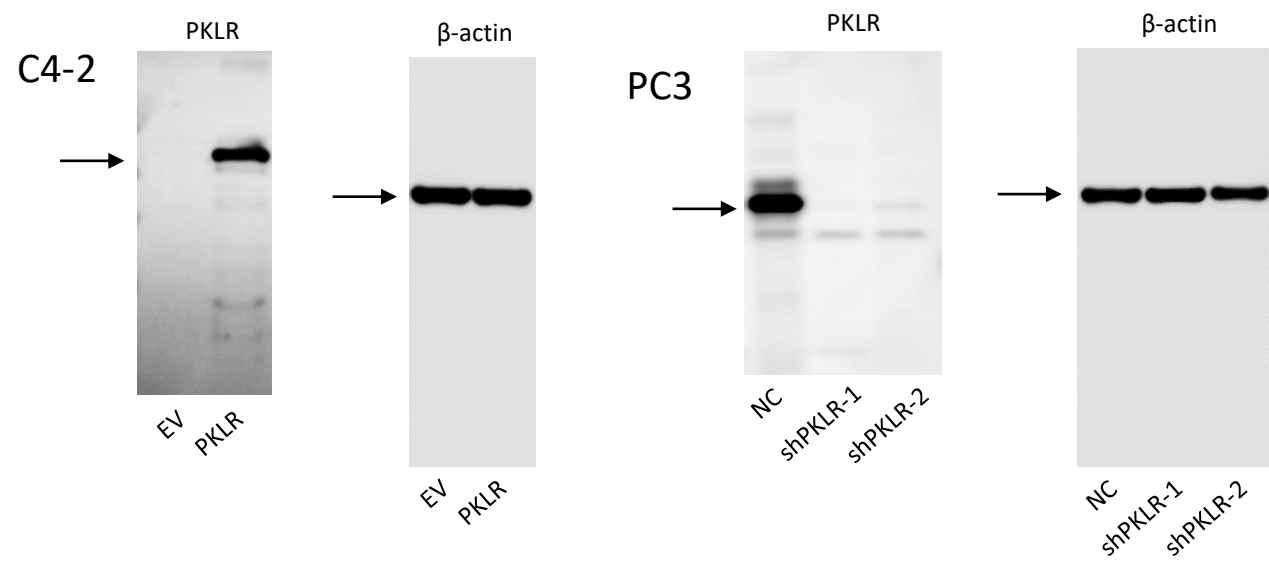

Supplement: 41419_2022_4694_MOESM13_ESM.pdf [file 41419_2022_4694_MOESM13_ESM.pdf]
